# Supplementary material
Source: PubMed Central journal article supplement (PMC3982232)
Supplement: NIHMS418196-supplement-1_si_001.pdf [file NIHMS418196-supplement-1_si_001.pdf]

## **Supporting information**

### **Catalytic Effects of Mutations of Distant Protein Residues in Human DNA Polymerase $\beta$ : Theory and Experiment**

Martin Klvaňa, Drew L. Murphy, Petr Jeřábek, Myron F. Goodman, Arieh Warshel, Joann  
B. Sweasy, Jan Florián

**Equations S1-12:** Cancelling  $\Delta\Delta G_{\text{solv}}$  terms from thermodynamic cycle (Figure 2) for calculating the relative binding free energies of WT ( $R$ ) and mutant ( $R'$ ) amino acid residue;  $E$  – enzyme;  $W$  – water;  $gas$  – gas phase.

$$\Delta G_E - \Delta G_{\text{bind}}(R') - \Delta\Delta G_{\text{solv}} + \Delta G_{\text{bind}}(R) = 0 \quad (S1)$$

$$\Delta G_E = \Delta G_{\text{bind}}(R') + \Delta\Delta G_{\text{solv}} - \Delta G_{\text{bind}}(R) \quad (S2)$$

$$\Delta G_{\text{bind}}(R') = G(R')_E - G(R')_W \quad (S3)$$

$$\Delta G_{\text{bind}}(R) = G(R)_E - G(R)_W \quad (S4)$$

$$\Delta\Delta G_{\text{solv}} = \Delta G_{\text{solv}}(R') - \Delta G_{\text{solv}}(R) \quad (S5)$$

$$\Delta G_{\text{solv}}(R') = G(R')_W - G(R')_{\text{gas}} \quad (S6)$$

$$\Delta G_{\text{solv}}(R) = G(R)_W - G(R)_{\text{gas}} \quad (S7)$$

$$\Delta G_E = G(R')_E - G(R')_W + G(R')_W - G(R')_{\text{gas}} - G(R)_W + G(R)_{\text{gas}} - G(R)_E + G(R)_W \quad (S8)$$

$$G(R')_{\text{gas}} = 0 \quad (S9)$$

$$G(R)_{\text{gas}} = 0 \quad (S10)$$

$$\Delta G_E = G(R')_E - \cancel{G(R')_W} + \cancel{G(R')_W} - 0 - \cancel{G(R)_W} + 0 - G(R)_E + \cancel{G(R)_W} \quad (S11)$$

$$\Delta G_E = G(R')_E - G(R)_E \quad (S12)$$

**Table S1:** Atomic charges (a.u.) of electroneutral phosphate group and ionizable amino acid residues<sup>a</sup>.

| Atom                   | Charge  | Atom            | Charge  |
|------------------------|---------|-----------------|---------|
| <i>Phosphate group</i> |         | <i>Arginine</i> |         |
| P                      | 1.1659  | N               | -0.4157 |
| OP                     | -0.2761 | H               | 0.2719  |
|                        |         | CA              | -0.0597 |
| <i>Aspartate</i>       |         | HA              | 0.0869  |
| N                      | -0.4157 | CB              | 0.1303  |
| H                      | 0.2719  | HB              | 0.0187  |
| CA                     | 0.0341  | CG              | -0.0430 |
| HA                     | 0.0864  | HG              | 0.0236  |
| CB                     | 0.1316  | CD              | -0.0660 |
| HB                     | 0.0488  | HD              | 0.0186  |
| CG                     | 0.7755  | NE              | -0.8000 |
| OD                     | -0.5054 | HE              | 0.3456  |
| C                      | 0.5973  | CZ              | 0.3327  |
| O                      | -0.5679 | NH              | -0.8627 |
|                        |         | HH              | 0.4478  |
| <i>Glutamate</i>       |         | C               | 0.5973  |
| N                      | -0.4157 | O               | -0.5679 |
| H                      | 0.2719  |                 |         |
| CA                     | 0.0341  | <i>Lysine</i>   |         |
| HA                     | 0.0864  | N               | -0.4157 |
| CB                     | 0.0771  | H               | 0.2719  |
| HB                     | 0.0256  | CA              | -0.2400 |
| CG                     | 0.0149  | HA              | 0.1426  |
| HG                     | 0.0430  | CB              | -0.0094 |
| CD                     | 0.7755  | HB              | 0.0362  |
| OE                     | -0.5054 | CG              | -0.0907 |
| C                      | 0.5973  | HG              | 0.0103  |
| O                      | -0.5679 | CD              | -0.1200 |
|                        |         | HD              | 0.0621  |
|                        |         | CE              | -0.0723 |
|                        |         | HE              | 0.0335  |
|                        |         | NZ              | -0.8000 |
|                        |         | HZ              | 0.3400  |
|                        |         | C               | 0.5973  |
|                        |         | O               | -0.5679 |

<sup>a</sup> Our experience gained from countless calculations (long before most research groups) with studies using the SCAAS +LRF spherical boundary conditions is that the far ionized residues should be neutralized and then, if needed, treated with Coulomb law and a dielectric of 40 or more.

**Table S2:** FEP alchemistic mutagenesis.

| Mutations <sup>a</sup>         | Number of windows (N) | Set of $\lambda$ values <sup>b</sup>                                             |
|--------------------------------|-----------------------|----------------------------------------------------------------------------------|
| L-Hil282→M/L <sup>c</sup>      | 101                   | {1.0000, 0.9900, 0.9800, 0.9700, . . . , 0.0400, 0.0300, 0.0200, 0.0100, 0.0000} |
| I174→S, Q260→Q, H285→D, K289→M | 104                   | {1.0000, 0.9900, 0.9800, 0.9700, . . . , 0.0100, 0.0050, 0.0010, 0.0001, 0.0000} |
| K288→E, R283→A, R283→L         | 203                   | {1.0000, 0.9950, 0.9000, 0.9850, . . . , 0.0100, 0.0050, 0.0010, 0.0001, 0.0000} |

<sup>a</sup> Arrows indicate direction of FEP alchemistic mutagenesis; *State 1* → *State 2*;

<sup>b</sup> Each FEP simulation was subdivided into N separate MD simulations (N windows) that differed in the value of the coupling parameter  $\lambda$ . The potential energy surface used in the  $i^{\text{th}}$  window was defined as

$$E_i = (1 - \lambda_i) E_{\text{State 1}} + \lambda_i E_{\text{State 2}}, i = 1, 2, \dots, N; \lambda_1 = 0 \text{ and } \lambda_N = 1.$$

<sup>c</sup> See Supplementary Figure S2.

**Table S3:** Average RMSD (Å) of the thumb subdomain in LIE simulations of binary (E) and transition state (TS) complexes of Pol  $\beta$  containing right ( $\mathcal{R}$ ) or wrong ( $\mathcal{W}$ ) dNTP substrate with respect to the crystal structures with open (1BPX), closed (2FMP) and partially open (3C2M) conformation of the thumb subdomain.<sup>a</sup>

| Variant         | 1BPX      |                      |                      | 2FMP      |                      |                      | 3C2M      |                      |                      |
|-----------------|-----------|----------------------|----------------------|-----------|----------------------|----------------------|-----------|----------------------|----------------------|
|                 | E         | TS ( $\mathcal{R}$ ) | TS ( $\mathcal{W}$ ) | E         | TS ( $\mathcal{R}$ ) | TS ( $\mathcal{W}$ ) | E         | TS ( $\mathcal{R}$ ) | TS ( $\mathcal{W}$ ) |
| WT <sup>b</sup> | 1.3 ± 1.4 | 5.0 ± 1.4            | 4.2 ± 1.4            | 3.7 ± 2.7 | 0.7 ± 0.8            | 0.8 ± 1.1            | 2.5 ± 2.3 | 1.3 ± 1.2            | 0.8 ± 1.0            |
| I174S           | 1.9 ± 0.7 | 5.0 ± 0.6            | 4.0 ± 0.4            | 2.3 ± 0.8 | 0.6 ± 0.3            | 0.9 ± 0.3            | 1.3 ± 0.6 | 1.3 ± 0.5            | 0.8 ± 0.3            |
| I260Q           | 3.7 ± 0.7 | 5.2 ± 0.5            | 2.8 ± 0.5            | 2.5 ± 0.4 | 0.7 ± 0.3            | 1.5 ± 0.4            | 2.2 ± 0.4 | 1.3 ± 0.4            | 0.7 ± 0.2            |
| M282L           | 2.1 ± 0.5 | 5.2 ± 0.4            | 4.6 ± 0.7            | 2.0 ± 0.6 | 0.5 ± 0.2            | 1.0 ± 0.4            | 1.2 ± 0.5 | 1.4 ± 0.4            | 1.3 ± 0.5            |
| H285D           | 0.9 ± 0.4 | 5.0 ± 0.6            | 3.8 ± 0.5            | 3.3 ± 0.9 | 0.8 ± 0.3            | 0.8 ± 0.3            | 2.0 ± 0.8 | 1.4 ± 0.4            | 0.8 ± 0.3            |
| E288K           | 1.5 ± 0.6 | 5.4 ± 0.4            | 3.4 ± 0.4            | 3.0 ± 0.7 | 0.7 ± 0.3            | 1.2 ± 0.3            | 1.7 ± 0.6 | 1.6 ± 0.3            | 0.5 ± 0.2            |
| K289M           | 0.8 ± 0.4 | 4.8 ± 0.6            | 4.0 ± 0.6            | 3.4 ± 0.8 | 0.5 ± 0.2            | 1.6 ± 0.3            | 2.2 ± 0.7 | 1.1 ± 0.4            | 1.2 ± 0.4            |
| R283A           | 0.9 ± 0.5 | 4.6 ± 0.7            | 3.8 ± 0.4            | 3.4 ± 0.6 | 0.6 ± 0.3            | 1.0 ± 0.3            | 2.2 ± 0.5 | 1.0 ± 0.5            | 0.8 ± 0.3            |
| R283L           | 0.9 ± 0.3 | 4.3 ± 0.6            | 4.5 ± 0.5            | 4.6 ± 1.1 | 0.6 ± 0.2            | 0.6 ± 0.3            | 3.3 ± 1.0 | 0.8 ± 0.4            | 0.9 ± 0.4            |

<sup>a</sup> LIE simulations were initiated from 1BPX (E), 2FMP (TS,  $\mathcal{R}$ ) and 3C2M (TS,  $\mathcal{W}$ ).

<sup>b</sup> Average of eight independent MD simulations.

**Table S4.** Average RMSD of thumb sub-domain in LIE simulations of binary (E) and transition state (TS) complexes with respect to their initial X-ray crystal structures.

| Variant                | 2FMP <sup>a</sup> |           | 3C2M <sup>a</sup> |           |
|------------------------|-------------------|-----------|-------------------|-----------|
|                        | E                 | TS        | E                 | TS        |
| I174 (WT) <sup>b</sup> | 1.2 ± 0.4         | 0.5 ± 0.3 | 1.7 ± 0.8         | 1.0 ± 0.4 |
| S174                   | 0.9 ± 0.3         | 0.6 ± 0.3 | 1.0 ± 0.3         | 0.8 ± 0.3 |
| I260 (WT) <sup>b</sup> | 1.1 ± 0.3         | 0.9 ± 0.4 | 1.2 ± 0.5         | 1.1 ± 0.4 |
| Q260                   | 0.8 ± 0.3         | 0.7 ± 0.3 | 1.3 ± 0.6         | 0.7 ± 0.2 |
| R283 (WT) <sup>b</sup> | 0.7 ± 0.3         | 0.7 ± 0.3 | 0.9 ± 0.3         | 0.9 ± 0.4 |
| A283                   | 1.1 ± 0.6         | 0.6 ± 0.3 | 1.3 ± 0.6         | 0.8 ± 0.3 |
| L283                   | 1.2 ± 0.6         | 0.6 ± 0.2 | 0.8 ± 0.3         | 0.9 ± 0.4 |

<sup>a</sup> Initial X-ray crystal structure used in LIE simulations.

<sup>b</sup> Individual WT simulations differ in their definition of the probe-region of the simulated system; the probe region included the side-chain of the amino acid listed in the left column.

**Table S5.** Relative free energies (kcal/mol) of Pol  $\beta$  point mutations calculated using the FEP method.

| Mutant | $\Delta G_E$     |                      | $\Delta G_{TS} (GC)$ |                      | $\Delta G_{TS} (GA)$ |                      |
|--------|------------------|----------------------|----------------------|----------------------|----------------------|----------------------|
|        | FEP <sup>a</sup> | FEP/LIE <sup>b</sup> | FEP <sup>a</sup>     | FEP/LIE <sup>b</sup> | FEP <sup>a</sup>     | FEP/LIE <sup>b</sup> |
| I174S  | 1.8              | 5.9                  | 0.4                  | 5.6                  | 0.8                  | 5.7                  |
| I260Q  | -32.8            | -31.3                | -32.8                | -30.6                | -31.5                | -30.5                |
| M282L  | -8.7             | -8.6                 | -9.0                 | -8.1                 | -8.8                 | -8.5                 |
| H285D  | -16.6            | -6.0                 | -18.2                | -6.2                 | -17.7                | -5.3                 |
| E288K  | 12.7             | 5.2                  | 11.1                 | 4.0                  | 11.9                 | 4.8                  |
| K289M  | 25.3             | 24.0                 | 26.3                 | 24.6                 | 26.5                 | 25.0                 |
| R283A  | 118.5            | 120.9                | 120.3                | 122.4                | 118.5                | 121.0                |
| R283L  | 88.5             | 88.7                 | 90.9                 | 90.8                 | 86.4                 | 87.1                 |

<sup>a</sup> Free energies scaled by an empirical factor of 0.5.

<sup>b</sup> hybrid FEP/LIE method (eq 10).

**Table S6:** Electrostatic (*ES*) and van der Waals (*vdw*) contributions to  $\Delta G$  (in kcal/mol) calculated by the LIE method.<sup>a</sup>

| Mutation | $\Delta G_E$ |            | $\Delta G_{TS}(GC)$ |            | $\Delta G_{TS}(GA)$ |            |
|----------|--------------|------------|---------------------|------------|---------------------|------------|
|          | <i>ES</i>    | <i>vdw</i> | <i>ES</i>           | <i>vdw</i> | <i>ES</i>           | <i>vdw</i> |
| I174S    | -6.6         | 4.1        | -6.7                | 3.4        | -6.7                | 3.6        |
| I260Q    | -6.8         | 0.2        | -9.3                | 1.0        | -8.5                | 0.0        |
| M282L    | -3.8         | 0.9        | -3.6                | 1.5        | -4.2                | 1.2        |
| H285D    | -50.2        | 6.2        | -51.1               | 6.4        | -52.0               | 6.9        |
| E288K    | 6.5          | -3.0       | 3.5                 | -2.9       | 5.4                 | -3.5       |
| K289M    | 59.2         | -2.4       | 59.2                | -2.8       | 60.5                | -2.6       |
| R283A    | 60.5         | 4.0        | 54.8                | 6.8        | 64.0                | 4.3        |
| R283L    | 53.7         | 2.0        | 48.3                | 2.9        | 57.1                | 1.8        |

<sup>a</sup>  $\alpha = 0.45$ ;  $\beta = 0.43$  [see eq. 7 and 8];

**Table S7:** Electrostatic (*ES*) and van der Waals (*vdw*) contributions to  $\Delta G$  (in kcal/mol) calculated by FEP.<sup>a</sup>

| Mutation | $\Delta G_E$           |           |            | $\Delta G_{TS}(GC)$ |           |            | $\Delta G_{TS}(GA)$ |           |            |
|----------|------------------------|-----------|------------|---------------------|-----------|------------|---------------------|-----------|------------|
|          | <i>QQ</i> <sup>b</sup> | <i>ES</i> | <i>vdw</i> | <i>QQ</i>           | <i>ES</i> | <i>vdw</i> | <i>QQ</i>           | <i>ES</i> | <i>vdw</i> |
| I174S    | 3.7                    | -2.0      | 0.2        | 4.0                 | -1.8      | -1.8       | 4.0                 | -1.9      | -1.3       |
| I260Q    | -24.2                  | -7.4      | -1.2       | -24.2               | -7.4      | -1.2       | -23.8               | -6.7      | -0.9       |
| M282L    | -10.1                  | 0.6       | 0.8        | -10.2               | 0.6       | 0.6        | -10.5               | 0.8       | 0.9        |
| H285D    | 16.9                   | -29.2     | -4.0       | 17.4                | -29.9     | -5.1       | 17.1                | -29.2     | -4.2       |
| E288K    | 4.0                    | 4.2       | 3.3        | 3.7                 | 3.2       | 3.8        | 2.4                 | 5.9       | 3.8        |
| K289M    | -14.4                  | 40.9      | -1.2       | -14.7               | 42.1      | -1.2       | -14.7               | 42.3      | -1.1       |
| R283A    | 74.5                   | 42.4      | 1.4        | 74.2                | 41.4      | 5.3        | 73.9                | 42.8      | 3.2        |
| R283L    | 57.6                   | 29.1      | 1.7        | 59.3                | 27.2      | 4.3        | 55.8                | 30.0      | 0.6        |

<sup>a</sup> Both *ES* and *vdw* contributions scaled by a factor of 0.5;

<sup>b</sup>  $QQ = ES_{qq} + vdW_{qq}$

**Table S8.**  $\Delta G_{\text{solv}}$  (kcal/mol) calculated using the LIE method.<sup>a</sup>

| Residue | $\Delta G_{\text{solv}}(\text{E})$ | $\Delta G_{\text{solv}}(\text{TS,GC})$ | $\Delta G_{\text{solv}}(\text{TS,GA})$ |
|---------|------------------------------------|----------------------------------------|----------------------------------------|
| I174    | -7.5                               | -6.6                                   | -6.7                                   |
| S174    | -10.0                              | -9.9                                   | -9.9                                   |
| I260    | -8.0                               | -8.1                                   | -8.6                                   |
| Q260    | -14.5                              | -16.5                                  | -17.0                                  |
| M282    | -5.3                               | -5.8                                   | -5.3                                   |
| L282    | -8.2                               | -8.0                                   | -8.3                                   |
| H285    | -14.7                              | -14.2                                  | -14.0                                  |
| D285    | -58.7                              | -59.0                                  | -59.2                                  |
| E288    | -53.1                              | -51.6                                  | -52.8                                  |
| K288    | -49.6                              | -51.0                                  | -50.9                                  |
| K289    | -58.7                              | -58.5                                  | -59.8                                  |
| M289    | -2.0                               | -2.0                                   | -1.9                                   |
| R283    | -66.3                              | -65.5                                  | -70.6                                  |
| A283    | 0.1                                | -0.1                                   | 0.2                                    |
| L283    | -8.6                               | -9.1                                   | -9.6                                   |

<sup>a</sup>  $\alpha = 0.45$ ;  $\beta = 0.43$  (see eq. 7 and 8)

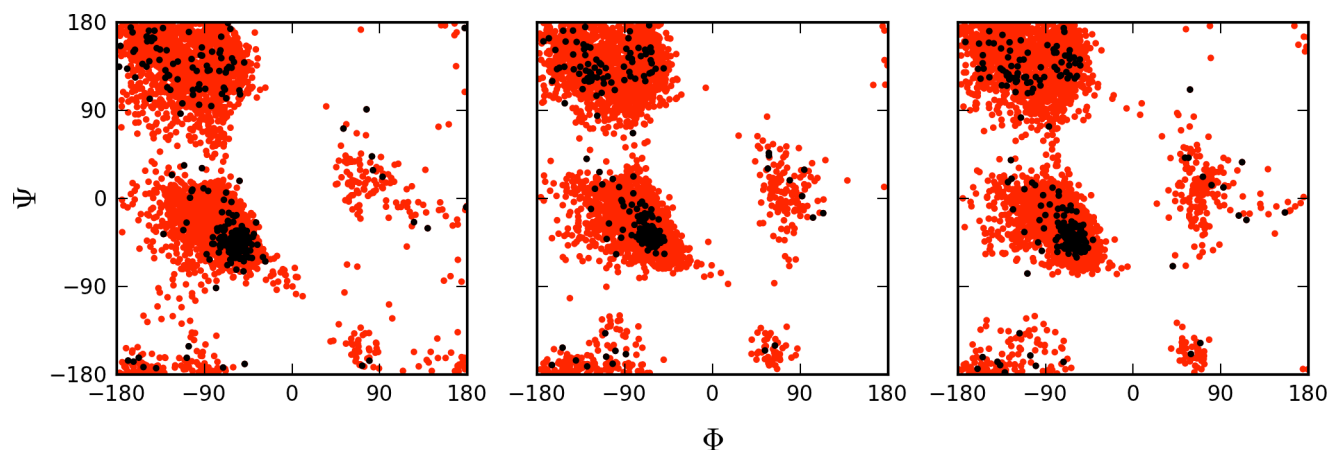

**Figure S1:** Ramachandran plots of distribution of  $\phi$  and  $\psi$  dihedral angles in X-ray crystal structures (black) and MD simulations of WT Pol  $\beta$  (red). *Left*, 1BPX X-ray crystal structure *vs.* MD simulation of open binary complex initiated from 1BPX; *center*, 2FMP X-ray crystal structure *vs.* MD simulation of  $\mathcal{R}$ TS initiated from 2FMP; *right*, 3C2M X-ray crystal structure *vs.* MD simulation of  $\mathcal{W}$ TS initiated from 3C2M. 10-ns MD trajectories were generated using ff94 force field and sampled for the dihedral angles every 500 ps; only residues included in the 33 Å simulation sphere are shown.

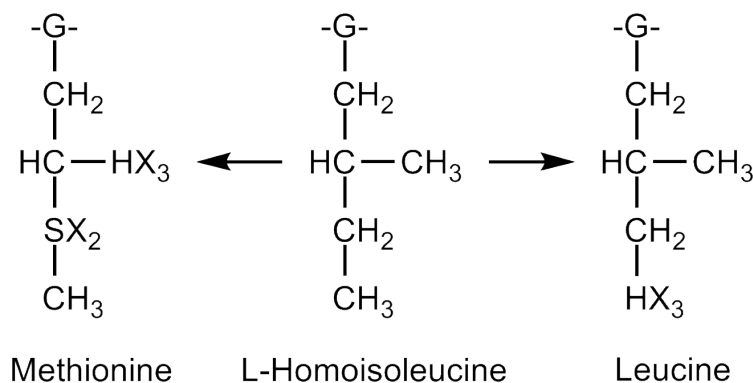

**Figure S2:**  $\Delta G_{\text{FEP}}$  values for M282L mutation were calculated by combining two FEP simulations: FEP mutation of L-hom isoleucine (Hil) to methionine and FEP mutation of L-hom isoleucine to leucine;  $\Delta G_{\text{FEP}} = -\Delta G(\text{Hil} \rightarrow \text{Met}) + \Delta G(\text{Hil} \rightarrow \text{Leu})$ . -G-, glycine fragment of the amino acid residues; X, dummy atom.



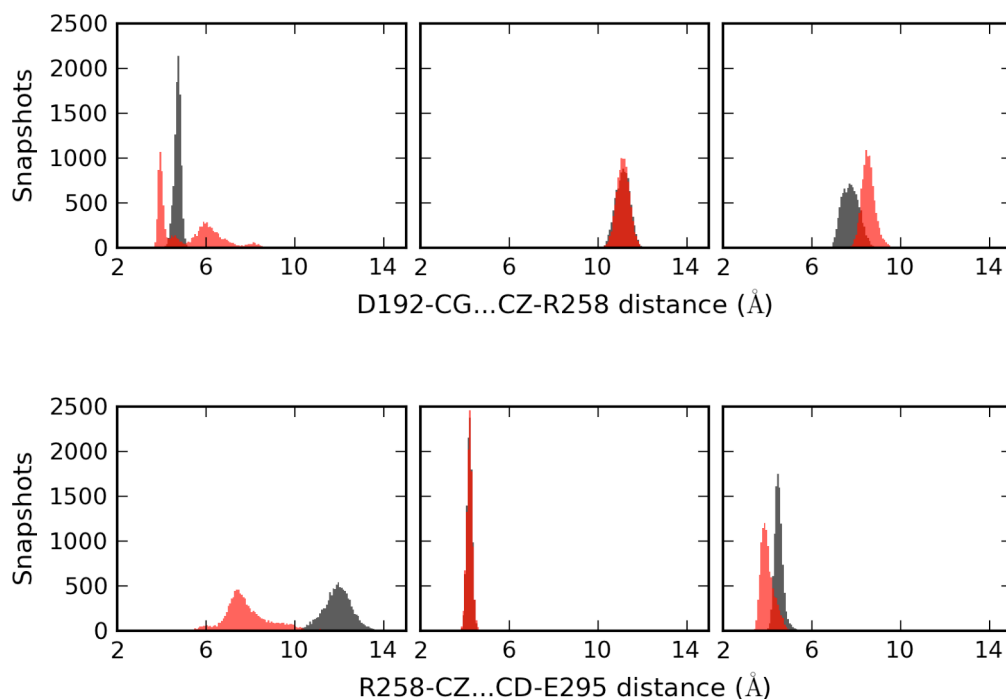

**Figure S3:** Histograms of distances between active site residues in MD simulations of WT (grey) and I174S mutant (red) of Pol  $\beta$ . *Left*, MD simulations of binary complexes initiated from 1BPX (open) X-ray crystal structure; *center*, MD simulations of  $\mathcal{R}$  TS complexes initiated from 2FMP (closed) X-ray crystal structure; *right*, MD simulations of  $\mathcal{W}$  TS complexes initiated from 3C2M (partially open) X-ray crystal structure. Note the breaking of D192-R258 interaction in the binary complex of I174S mutant and concomitant shortening the distance between R258 and E295, two hallmarks of catalytically competent state formation.

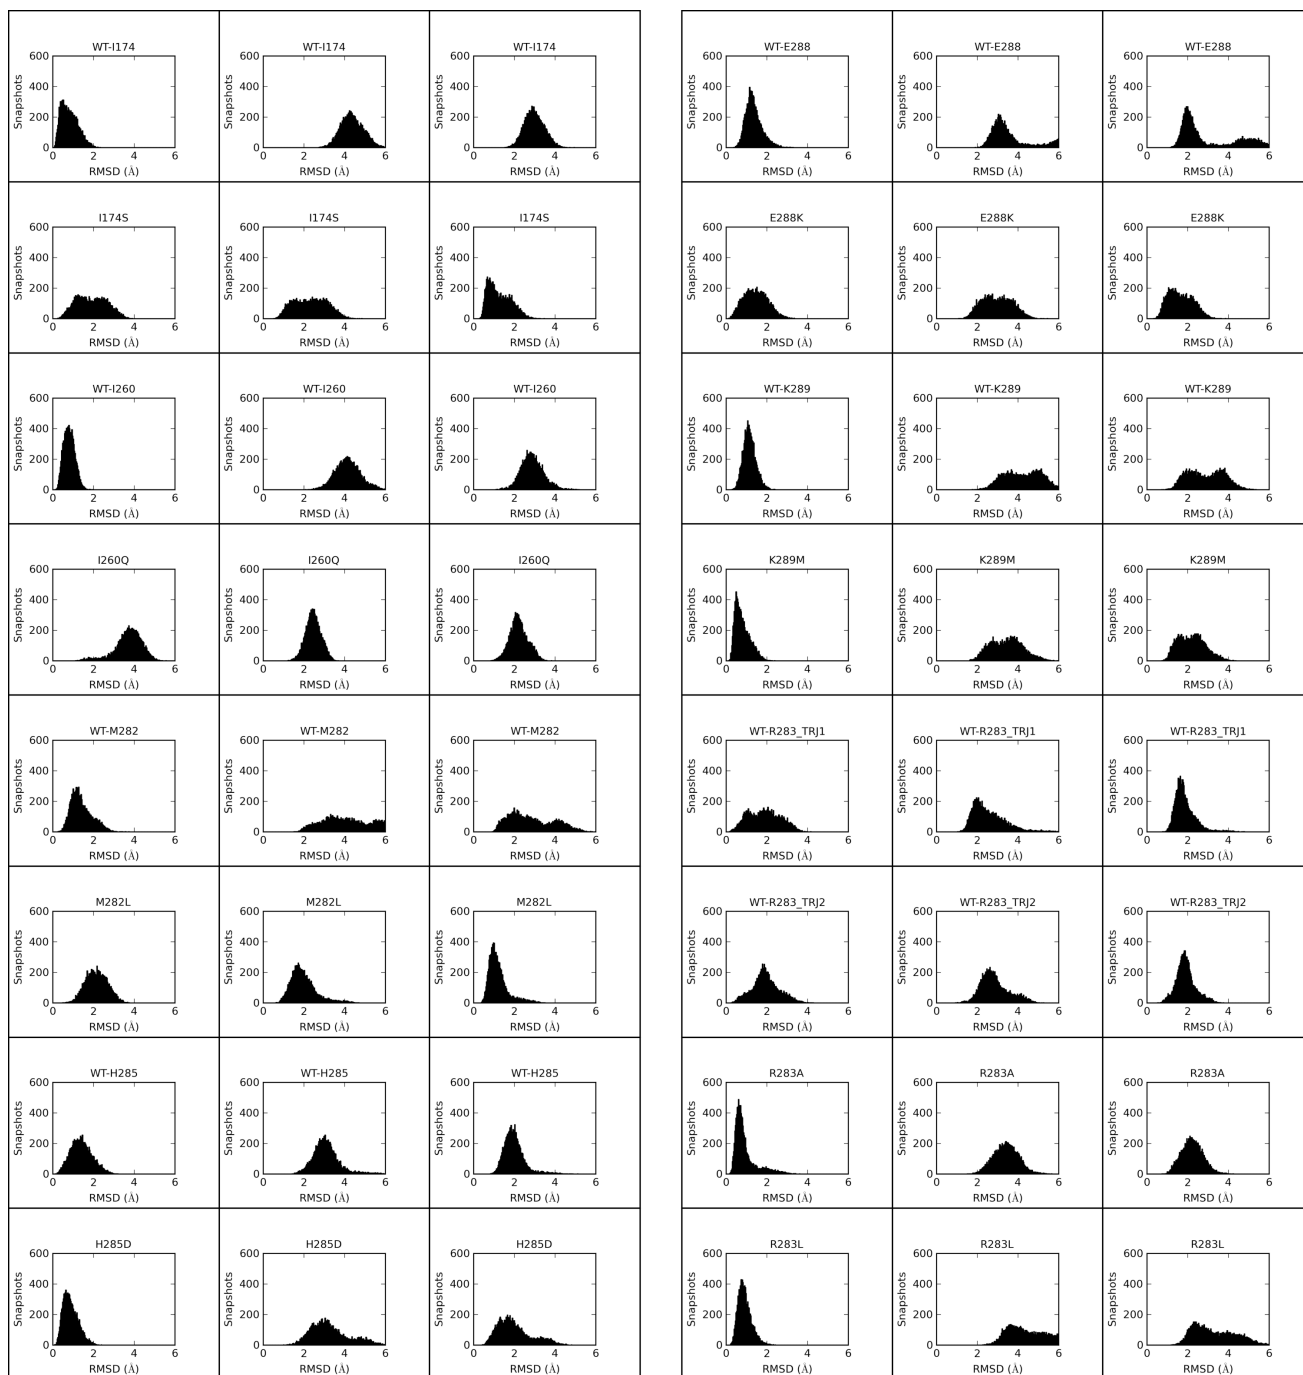

**Figure S4:** Histograms of the calculated RMSD of the thumb sub-domain of the binary complexes of WT Pol  $\beta$  and its mutants. The RMSD values were measured from the open (left column), closed (middle column) and partially open (right column) protein conformations that were defined by the coordinates of the corresponding 1BPX, 2FMP and 3C2M crystal structures. All RMSD ensembles were generated from 10 ns MD trajectories that were initiated from the open (pdb code 1BPX) X-ray crystal structure. Note that several histograms for the WT Pol  $\beta$  are shown. These histograms correspond to independent simulations of the WT Pol  $\beta$  that differ in the definition of the probe region of the protein (Figure 3).

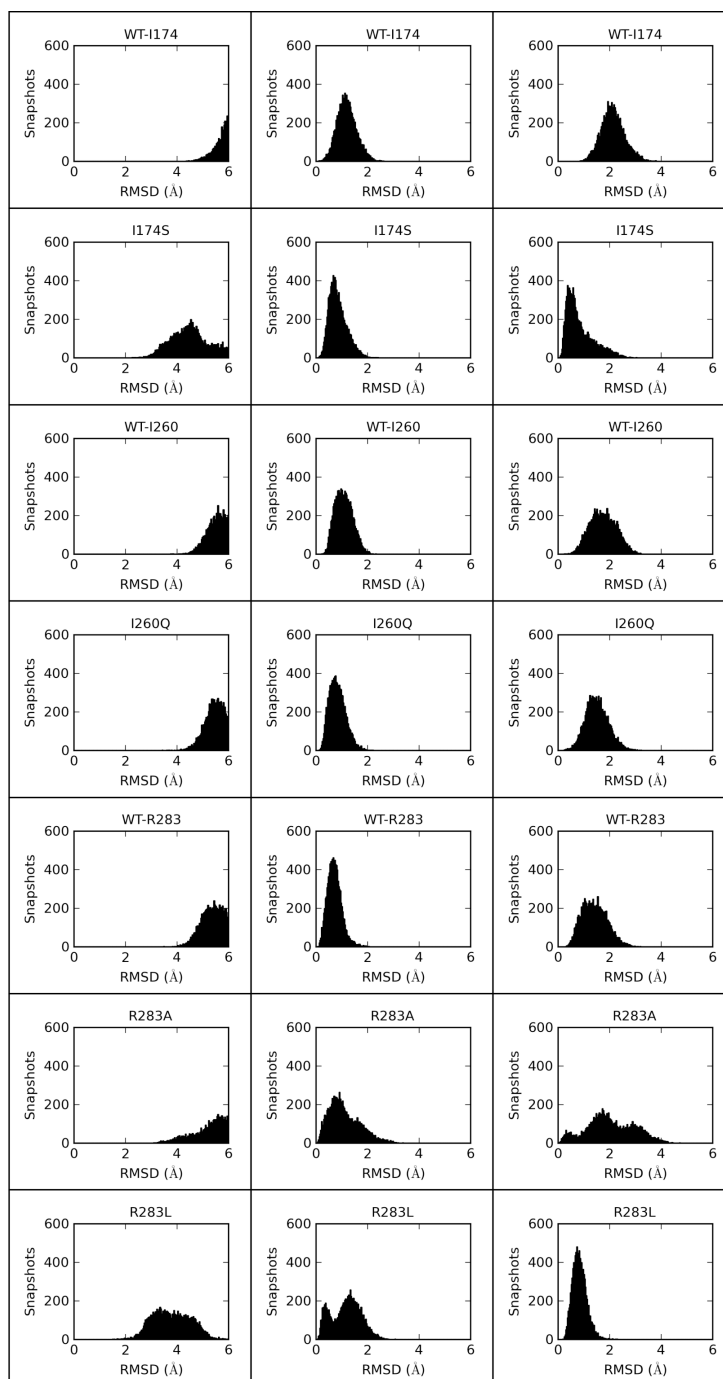

**Figure S5:** Histograms of the calculated RMSD of the thumb sub-domain of the binary complexes of WT Pol  $\beta$  and its four mutants. The RMSD values were measured from the open (left column), closed (middle column) and partially open (right column) protein conformations that were defined by the coordinates of the corresponding 1BPX, 2FMP and 3C2M crystal structures. All RMSD ensembles were generated from 10 ns MD trajectories that were initiated from the closed (pdb code 2FMP) X-ray crystal structure after the removal of the dCTP·Na<sup>+</sup>·Mg<sup>2+</sup> substrate. Note that the histograms labeled WT-I174S, WT-I260 and WT-R283 correspond to three independent simulations of the WT Pol  $\beta$ , that differ in the definition of the probe region of the protein (I174S, I260 or R283).

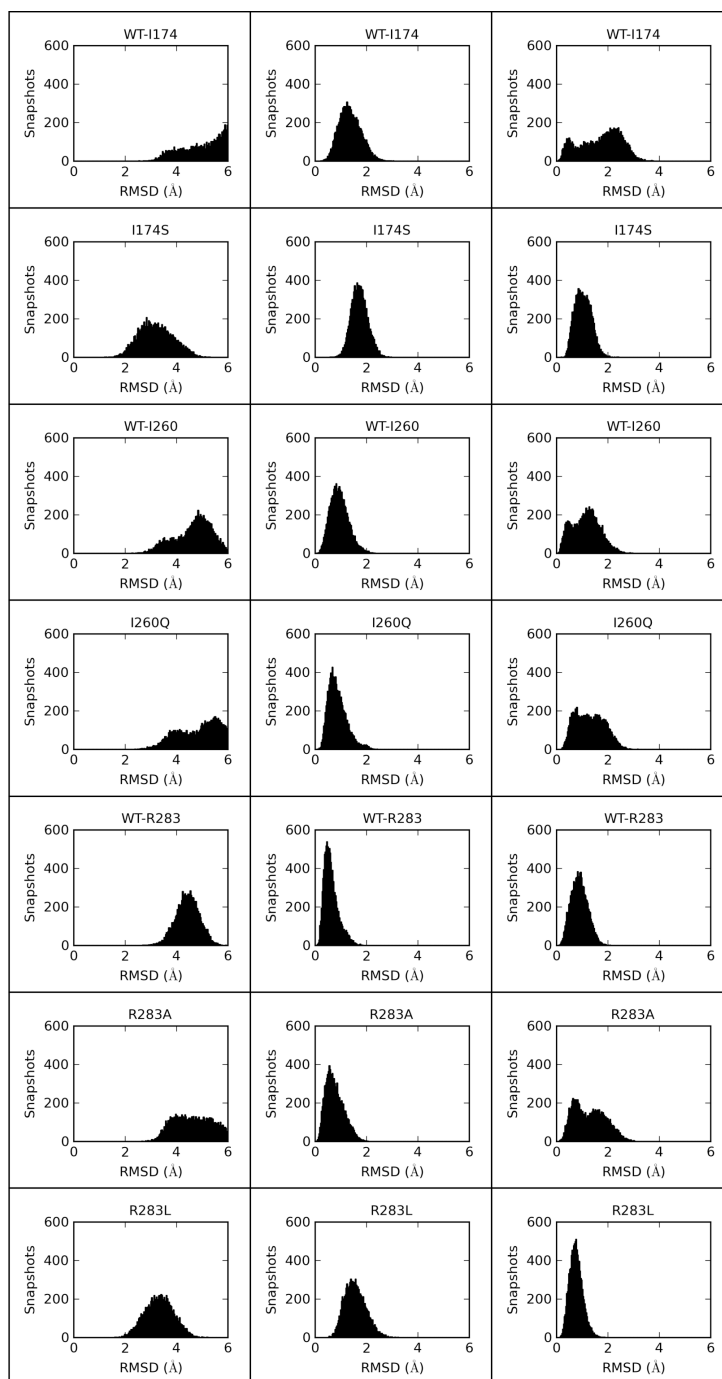

**Figure S6:** Histograms of the calculated RMSD of the thumb sub-domain of the binary complexes of WT Pol  $\beta$  and its four mutants. The RMSD values were measured from the open (left column), closed (middle column) and partially open (right column) protein conformations that were defined by the coordinates of the corresponding 1BPX, 2FMP and 3C2M crystal structures. All RMSD ensembles were generated from 10 ns MD trajectories that were initiated from the partially closed (pdb code 3C2M) X-ray crystal structure after the removal of the dGTP·2Mn<sup>2+</sup> substrate. Note that the histograms labeled WT-I174, WT-I260 and WT-R283 correspond to three independent simulations of the WT Pol  $\beta$  that differ in the definition of the probe region of the protein (I174, I260 or R283).

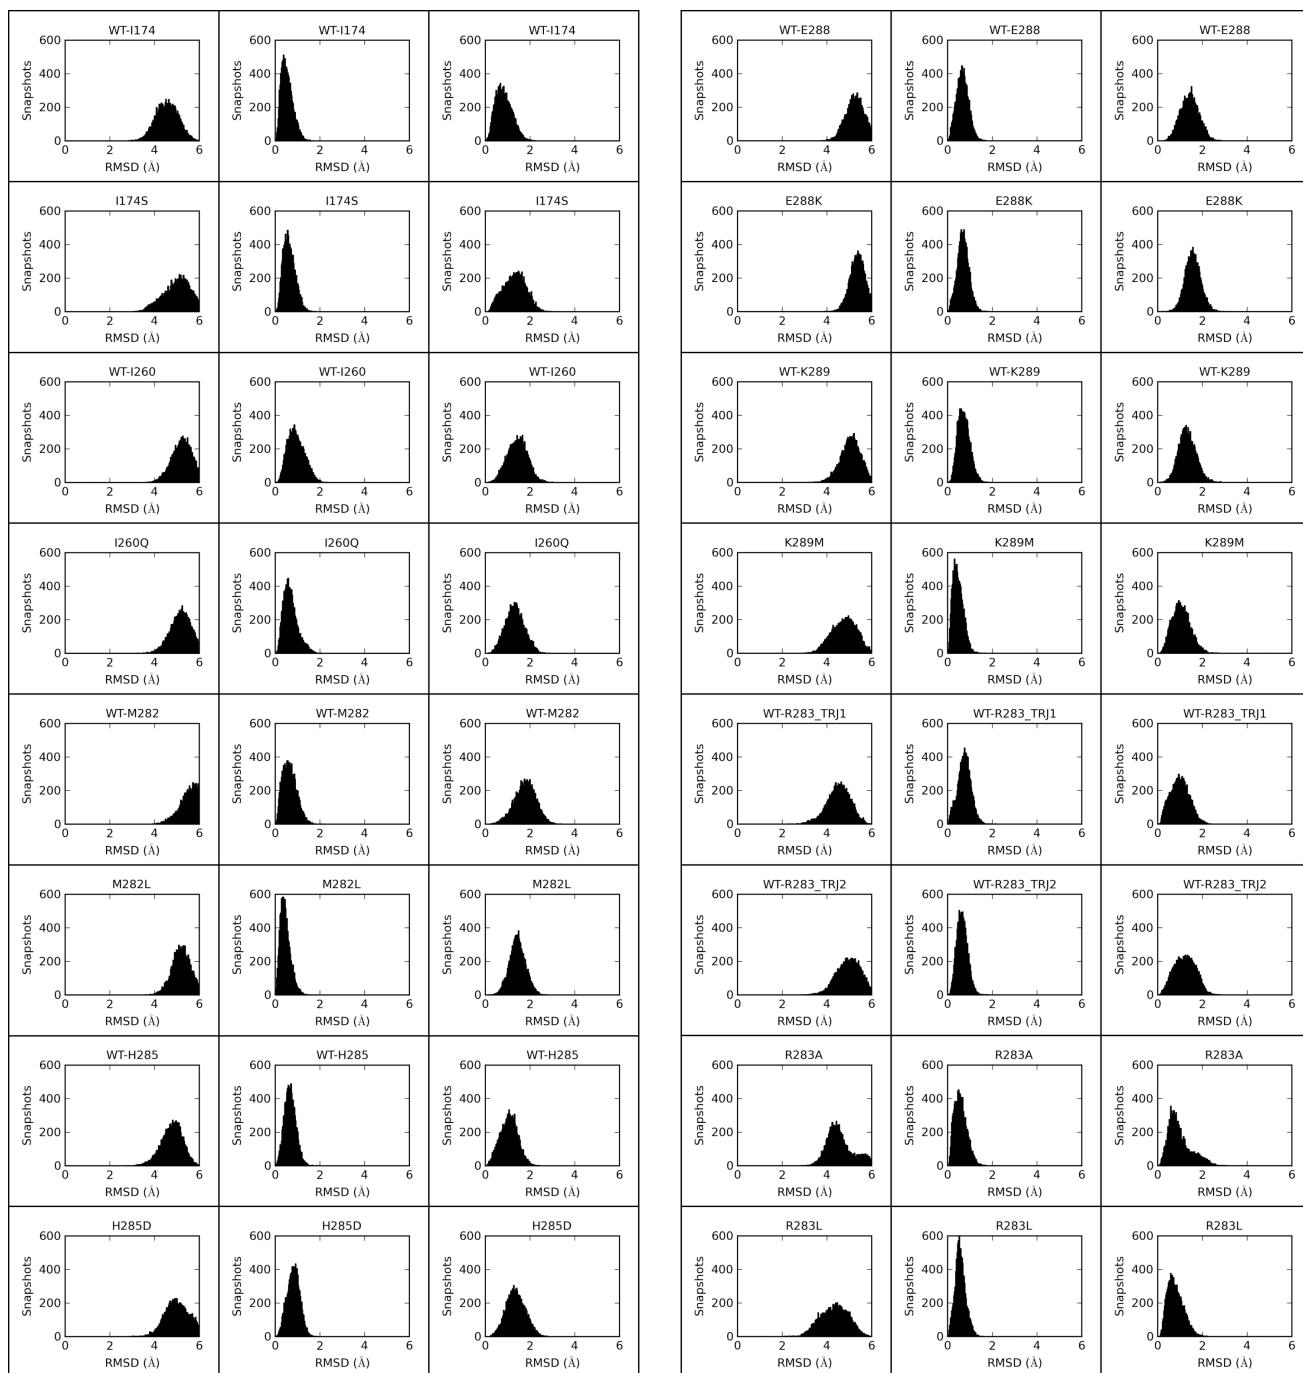

**Figure S7:** Histograms of the calculated RMSD of the thumb sub-domain of the  $\mathcal{R}$  TS complexes of WT Pol  $\beta$  and its mutants. The RMSD values were measured from the open (left column), closed (middle column) and partially open (right column) protein conformations that were defined by the coordinates of the corresponding 1BPX, 2FMP and 3C2M crystal structures. All RMSD ensembles were generated from 10 ns MD trajectories that were initiated from the closed (pdb code 2FMP) X-ray crystal structure subjected to distance constraints on  $\text{PO}_3'$  and  $\text{PO}_{1g}$  bonds. Note that several histograms for the WT Pol  $\beta$  are shown. These histograms correspond to independent simulations of the WT Pol  $\beta$  that differ in the definition of the probe region of the protein (Figure 3).

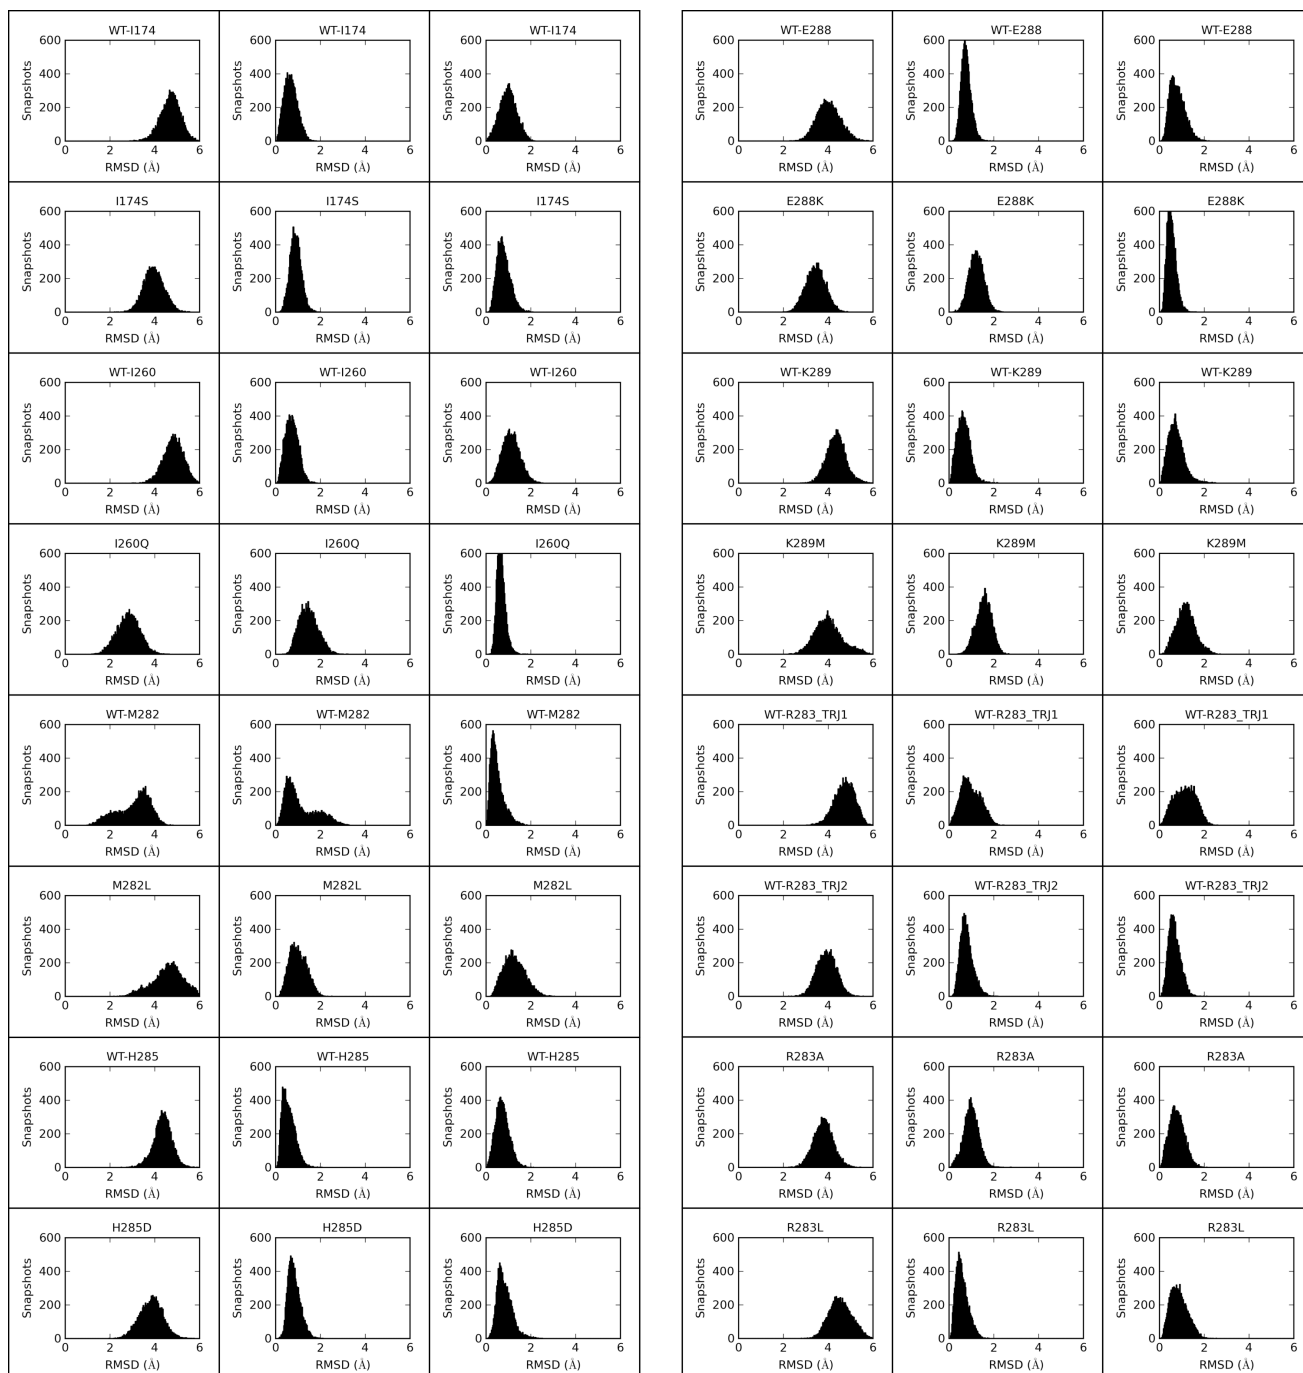

**Figure S8:** Histograms of the calculated RMSD of the thumb sub-domain of the  $\mathcal{W}$ TS complexes of WT Pol  $\beta$  and its mutants. The RMSD values were measured from the open (left column), closed (middle column) and partially open (right column) protein conformations that were defined by the coordinates of the corresponding 1BPX, 2FMP and 3C2M crystal structures. All RMSD ensembles were generated from 10 ns MD trajectories that were initiated from the partially closed (pdb code 3C2M) X-ray crystal structure subjected to distance constraints on the  $\text{PO}_3'$  and  $\text{PO}_{1g}$  bonds. Note that several histograms for the WT Pol  $\beta$  are shown. These histograms correspond to independent simulations of the WT Pol  $\beta$  that differ in the definition of the probe region of the protein (Figure 3).
